# Supplementary material for: In Silico Modeling and Characterization of Epstein–Barr Virus Latent Membrane Protein 1 Protein
Source: PubMed Central journal article supplement (PMC11656244; doi:10.1021/acsomega.4c06868), 2024-12-02
Supplement: ao4c06868_si_001.pdf [file ao4c06868_si_001.pdf]

***In silico* modelling and characterization of Epstein–Barr virus LMP1 protein**

Dayang-Sharyati D.A. Salam<sup>1</sup>, Kavinda Kashi Juliyan Gunasinghe<sup>1</sup>, Siaw San Hwang<sup>1</sup>, Irine Runnie Henry Ginjom<sup>1</sup>, Xavier Chee Wezen<sup>1,3\*</sup>, Taufiq Rahman<sup>2\*</sup>

<sup>1</sup>Faculty of Engineering, Computing and Science, Swinburne University of Technology Sarawak, Kuching 93350, Malaysia.

<sup>2</sup>Department of Pharmacology, University of Cambridge, Cambridge CB2 1PD, United Kingdom.

<sup>3</sup>Department of Biochemistry, Yong Loo Lin School of Medicine, National University of Singapore, Singapore 117596

Corresponding authors:

\* Email: [mtur2@cam.ac.uk](mailto:mtur2@cam.ac.uk) ;

\* Email: [xchee@swinburne.edu.my](mailto:xchee@swinburne.edu.my)

## Supporting Information

**Table S1** Ab initio docking results for LMP1 predicted structure.

| Model No. | No. of Subunits | Interface Area (in Angstrom <sup>2</sup> ) | Docking Score |
|-----------|-----------------|--------------------------------------------|---------------|
| 1         | 2-mer           | 2279.7                                     | 2350.543      |
| 2         | 2-mer           | 2173.8                                     | 2206.530      |
| 3         | 2-mer           | 1804.2                                     | 2103.901      |
| 4         | 5-mer           | 7891.9                                     | 1012.986      |
| 5         | 3-mer           | 3869.4                                     | 914.557       |

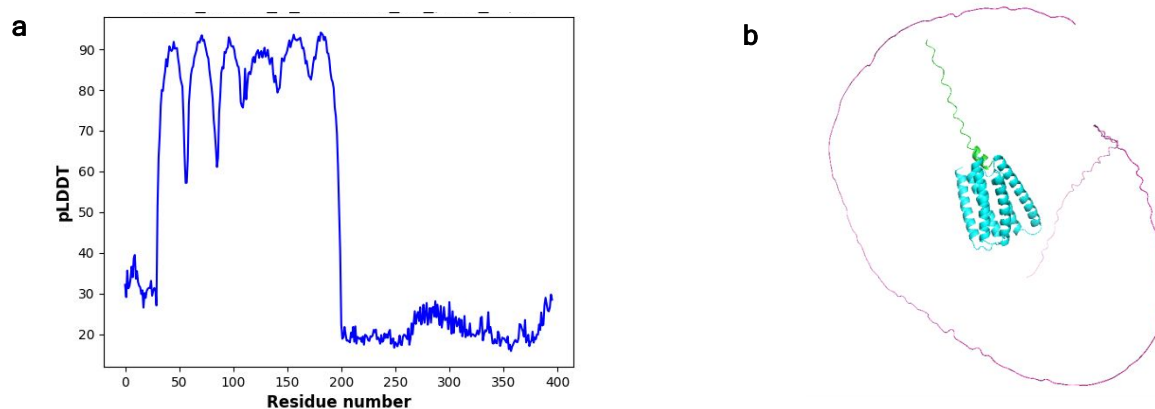

**Figure S1** (a) Per-residue confidence score for LMP1 model 3 (b) AlphaFold2 LMP1 model 3 image

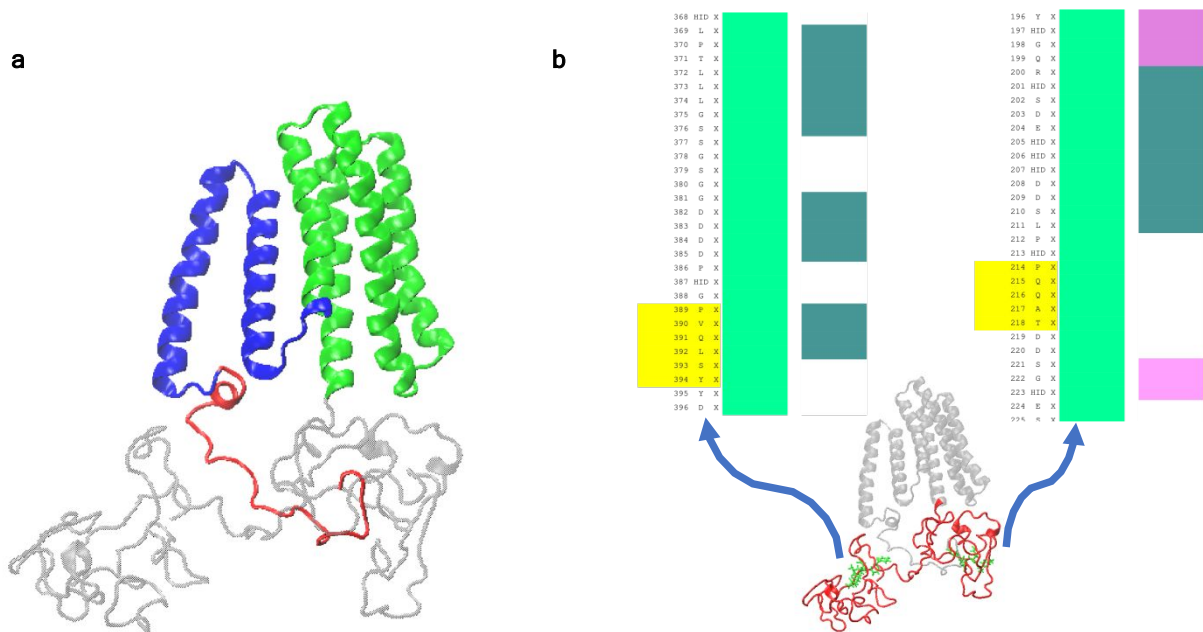

**Figure S2 (a)** The molecular image of TMD3-6 (green colour) and TMD1-2 (blue colour) responsible for the oligomerisation of the LMP1 protein. The red-colour chain represents the N-terminal domain of the LMP1 protein. **(b)** The CTAR1 and CTAR2 domains activate the cells.

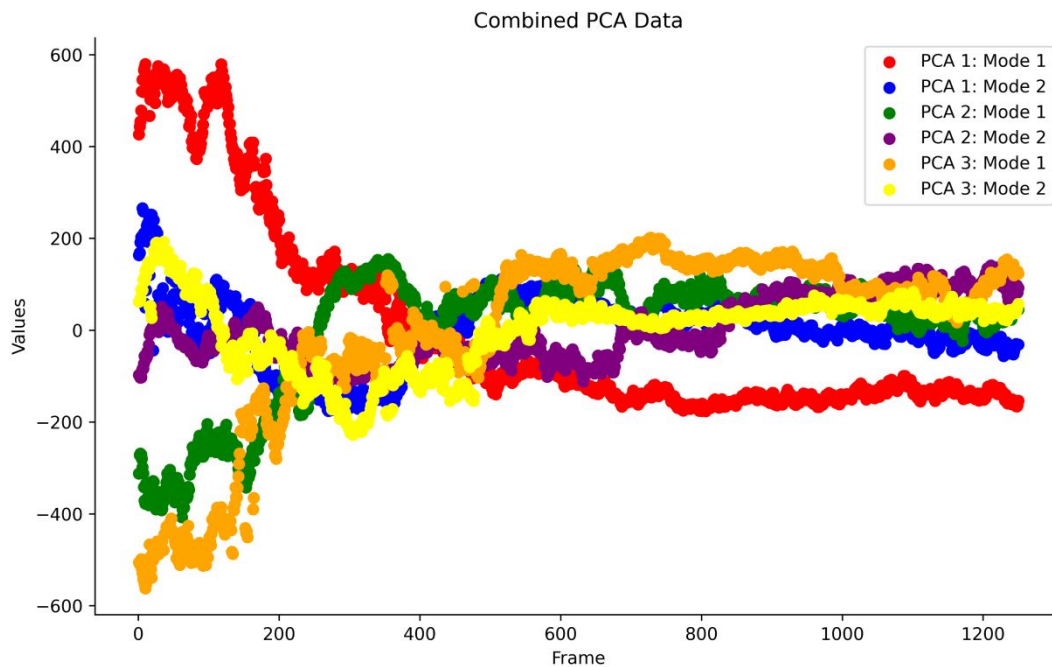

**Figure S3** Graph shows combined PCA data for all the triplicate runs with the values on the y-axis and frame on the x-axis.
